# Supplementary material for: Renal interstitial fibroblasts coproduce erythropoietin and renin under anaemic conditions
Source: PubMed Central journal article supplement — eBioMedicine. 2021 Jan 25;64:103209. doi: 10.1016/j.ebiom.2021.103209 (PMC7841315; doi:10.1016/j.ebiom.2021.103209), 2021-01-25
Supplement: mmc1.pdf [file mmc1.pdf]

## Consent for Acknowledgments

Manuscript Title:

Renal interstitial fibroblasts coproduce erythropoietin and renin under anaemic conditions

Corresponding author: Norio Suzuki

Article type: Article (Original Research)

### Person or entity being acknowledged to fill in items below:

I have seen a version of the manuscript to be submitted/published and I hereby give my consent for my name (or name of entity) to be included in the acknowledgement section in the above-named manuscript for consideration of publication in the *EBioMedicine*. I understand that this signed form will be submitted to the journal with the manuscript as evidence of my consent.

I understand that this manuscript may be published in the *EBioMedicine* and in products derived from the journals. As a result, I understand that the material may be seen by the general public. I understand that I may revoke consent at any time before publication, but once the information has been published revocation of the consent is no longer possible. I understand that I will derive no financial benefit from publication of this paper.

Atsuko Konuma

Name of Person (print name) and/or Entity (print entity name and name of person signing )

Atsuko Konuma

Signature (or signature of the person giving consent on behalf of the person)

Date

Dec, 7, 2020

Only complete this section if you are not the person. What is your relationship? (The person giving consent should be a substitute decision maker or legal guardian or should hold power of attorney for the person or entity.)

Why is the person not able to give consent? (e.g., is the person a minor, incapacitated, or deceased?)

## Consent for Acknowledgments

Manuscript Title:

Renal interstitial fibroblasts coproduce erythropoietin and renin under anaemic conditions

Corresponding author: Norio Suzuki

Article type: Article (Original Research)

### Person or entity being acknowledged to fill in items below:

I have seen a version of the manuscript to be submitted/published and I hereby give my consent for my name (or name of entity) to be included in the acknowledgement section in the above-named manuscript for consideration of publication in the *EBioMedicine*. I understand that this signed form will be submitted to the journal with the manuscript as evidence of my consent.

I understand that this manuscript may be published in the *EBioMedicine* and in products derived from the journals. As a result, I understand that the material may be seen by the general public. I understand that I may revoke consent at any time before publication, but once the information has been published revocation of the consent is no longer possible. I understand that I will derive no financial benefit from publication of this paper.

Mizuho Tanno

Name of Person (print name) and/or Entity (print entity name and name of person signing )

Mizuho Tanno

Signature (or signature of the person giving consent on behalf of the person)

Dec, 7, 2020

Date

Only complete this section if you are not the person. What is your relationship? (The person giving consent should be a substitute decision maker or legal guardian or should hold power of attorney for the person or entity.)

Why is the person not able to give consent? (e.g., is the person a minor, incapacitated, or deceased?)

## Consent for Acknowledgments

Manuscript Title:

Renal interstitial fibroblasts coproduce erythropoietin and renin under anaemic conditions

Corresponding author: Norio Suzuki

Article type: Article (Original Research)

### Person or entity being acknowledged to fill in items below:

I have seen a version of the manuscript to be submitted/published and I hereby give my consent for my name (or name of entity) to be included in the acknowledgement section in the above-named manuscript for consideration of publication in the *EBioMedicine*. I understand that this signed form will be submitted to the journal with the manuscript as evidence of my consent.

I understand that this manuscript may be published in the *EBioMedicine* and in products derived from the journals. As a result, I understand that the material may be seen by the general public. I understand that I may revoke consent at any time before publication, but once the information has been published revocation of the consent is no longer possible. I understand that I will derive no financial benefit from publication of this paper.

Atsushi Ishida

Name of Person (print name) and/or Entity (print entity name and name of person signing )

Atsushi Ishida

Signature (or signature of the person giving consent on behalf of the person)

Dec. 7 2020

Date

Only complete this section if you are not the person. What is your relationship? (The person giving consent should be a substitute decision maker or legal guardian or should hold power of attorney for the person or entity.)

Why is the person not able to give consent? (e.g., is the person a minor, incapacitated, or deceased?)

## Consent for Acknowledgments

Manuscript Title:

Renal interstitial fibroblasts coproduce erythropoietin and renin under anaemic conditions

Corresponding author: Norio Suzuki

Article type: Article (Original Research)

### Person or entity being acknowledged to fill in items below:

I have seen a version of the manuscript to be submitted/published and I hereby give my consent for my name (or name of entity) to be included in the acknowledgement section in the above-named manuscript for consideration of publication in the *EBioMedicine*. I understand that this signed form will be submitted to the journal with the manuscript as evidence of my consent.

I understand that this manuscript may be published in the *EBioMedicine* and in products derived from the journals. As a result, I understand that the material may be seen by the general public. I understand that I may revoke consent at any time before publication, but once the information has been published revocation of the consent is no longer possible. I understand that I will derive no financial benefit from publication of this paper.

Shunsuke Imai

Name of Person (print name) and/or Entity (print entity name and name of person signing )

Shunsuke Imai

Signature (or signature of the person giving consent on behalf of the person)

Dec 7. 2020

Date

Only complete this section if you are not the person. What is your relationship? (The person giving consent should be a substitute decision maker or legal guardian or should hold power of attorney for the person or entity.)

Why is the person not able to give consent? (e.g., is the person a minor, incapacitated, or deceased?)

## Consent for Acknowledgments

Manuscript Title:

Renal interstitial fibroblasts coproduce erythropoietin and renin under anaemic conditions

Corresponding author: Norio Suzuki

Article type: Article (Original Research)

### Person or entity being acknowledged to fill in items below:

I have seen a version of the manuscript to be submitted/published and I hereby give my consent for my name (or name of entity) to be included in the acknowledgement section in the above-named manuscript for consideration of publication in the *EBioMedicine*. I understand that this signed form will be submitted to the journal with the manuscript as evidence of my consent.

I understand that this manuscript may be published in the *EBioMedicine* and in products derived from the journals. As a result, I understand that the material may be seen by the general public. I understand that I may revoke consent at any time before publication, but once the information has been published revocation of the consent is no longer possible. I understand that I will derive no financial benefit from publication of this paper.

Tomoyo Arai

Name of Person (print name) and/or Entity (print entity name and name of person signing )

Tomoya Arai

Signature (or signature of the person giving consent on behalf of the person)

Dec 7. 2020

Date

Only complete this section if you are not the person. What is your relationship? (The person giving consent should be a substitute decision maker or legal guardian or should hold power of attorney for the person or entity.)

Why is the person not able to give consent? (e.g., is the person a minor, incapacitated, or deceased?)

## Consent for Acknowledgments

Manuscript Title:

Renal interstitial fibroblasts coproduce erythropoietin and renin under anaemic conditions

Corresponding author: Norio Suzuki

Article type: Article (Original Research)

### Person or entity being acknowledged to fill in items below:

I have seen a version of the manuscript to be submitted/published and I hereby give my consent for my name (or name of entity) to be included in the acknowledgement section in the above-named manuscript for consideration of publication in the *EBioMedicine*. I understand that this signed form will be submitted to the journal with the manuscript as evidence of my consent.

I understand that this manuscript may be published in the *EBioMedicine* and in products derived from the journals. As a result, I understand that the material may be seen by the general public. I understand that I may revoke consent at any time before publication, but once the information has been published revocation of the consent is no longer possible. I understand that I will derive no financial benefit from publication of this paper.

Yumako Ito

Name of Person (print name) and/or Entity (print entity name and name of person signing )

*Yumako Ito*

Signature (or signature of the person giving consent on behalf of the person)

*Dec. 7, 2020*

Date

Only complete this section if you are not the person. What is your relationship? (The person giving consent should be a substitute decision maker or legal guardian or should hold power of attorney for the person or entity.)

Why is the person not able to give consent? (e.g., is the person a minor, incapacitated, or deceased?)

## Consent for Acknowledgments

Manuscript Title:

Renal interstitial fibroblasts coproduce erythropoietin and renin under anaemic conditions

Corresponding author: Norio Suzuki

Article type: Article (Original Research)

### Person or entity being acknowledged to fill in items below:

I have seen a version of the manuscript to be submitted/published and I hereby give my consent for my name (or name of entity) to be included in the acknowledgement section in the above-named manuscript for consideration of publication in the *EBioMedicine*. I understand that this signed form will be submitted to the journal with the manuscript as evidence of my consent.

I understand that this manuscript may be published in the *EBioMedicine* and in products derived from the journals. As a result, I understand that the material may be seen by the general public. I understand that I may revoke consent at any time before publication, but once the information has been published revocation of the consent is no longer possible. I understand that I will derive no financial benefit from publication of this paper.

Chika Tanaka

Name of Person (print name) and/or Entity (print entity name and name of person signing )

Chika Tanaka

Signature (or signature of the person giving consent on behalf of the person)

Dec 7 2020

Date

Only complete this section if you are not the person. What is your relationship? (The person giving consent should be a substitute decision maker or legal guardian or should hold power of attorney for the person or entity.)

Why is the person not able to give consent? (e.g., is the person a minor, incapacitated, or deceased?)

## Consent for Acknowledgments

Manuscript Title:

Renal interstitial fibroblasts coproduce erythropoietin and renin under anaemic conditions

Corresponding author: Norio Suzuki

Article type: Article (Original Research)

### Person or entity being acknowledged to fill in items below:

I have seen a version of the manuscript to be submitted/published and I hereby give my consent for my name (or name of entity) to be included in the acknowledgement section in the above-named manuscript for consideration of publication in the *EBioMedicine*. I understand that this signed form will be submitted to the journal with the manuscript as evidence of my consent.

I understand that this manuscript may be published in the *EBioMedicine* and in products derived from the journals. As a result, I understand that the material may be seen by the general public. I understand that I may revoke consent at any time before publication, but once the information has been published revocation of the consent is no longer possible. I understand that I will derive no financial benefit from publication of this paper.

Hayato Yamaki

Name of Person (print name) and/or Entity (print entity name and name of person signing )

Hayato Yamaki

Signature (or signature of the person giving consent on behalf of the person)

Dec. 7. 2020

Date

Only complete this section if you are not the person. What is your relationship? (The person giving consent should be a substitute decision maker or legal guardian or should hold power of attorney for the person or entity.)

Why is the person not able to give consent? (e.g., is the person a minor, incapacitated, or deceased?)



## Consent for Acknowledgments

Manuscript Title:

Renal interstitial fibroblasts coproduce erythropoietin and renin under anaemic conditions

Corresponding author: Norio Suzuki

Article type: Article (Original Research)

### **Person or entity being acknowledged to fill in items below:**

I have seen a version of the manuscript to be submitted/published and I hereby give my consent for my name (or name of entity) to be included in the acknowledgement section in the above-named manuscript for consideration of publication in the *EBioMedicine*. I understand that this signed form will be submitted to the journal with the manuscript as evidence of my consent.

I understand that this manuscript may be published in the *EBioMedicine* and in products derived from the journals. As a result, I understand that the material may be seen by the general public. I understand that I may revoke consent at any time before publication, but once the information has been published revocation of the consent is no longer possible. I understand that I will derive no financial benefit from publication of this paper.

Keiko Taguchi

Name of Person (print name) and/or Entity (print entity name and name of person signing )

Keiko Taguchi  
Signature (or signature of the person giving consent on behalf of the person)

Dec/7/2020  
Date

Only complete this section if you are not the person. What is your relationship? (The person giving consent should be a substitute decision maker or legal guardian or should hold power of attorney for the person or entity.)

Why is the person not able to give consent? (e.g., is the person a minor, incapacitated, or deceased?)

## Consent for Acknowledgments

Manuscript Title:

Renal interstitial fibroblasts coproduce erythropoietin and renin under anaemic conditions

Corresponding author: Norio Suzuki

Article type: Article (Original Research)

### Person or entity being acknowledged to fill in items below:

I have seen a version of the manuscript to be submitted/published and I hereby give my consent for my name (or name of entity) to be included in the acknowledgement section in the above-named manuscript for consideration of publication in the *EBioMedicine*. I understand that this signed form will be submitted to the journal with the manuscript as evidence of my consent.

I understand that this manuscript may be published in the *EBioMedicine* and in products derived from the journals. As a result, I understand that the material may be seen by the general public. I understand that I may revoke consent at any time before publication, but once the information has been published revocation of the consent is no longer possible. I understand that I will derive no financial benefit from publication of this paper.

The Biomedical Research Core and  
Centre for Laboratory Animal Research of  
Tohoku University Graduate School of Medicine  
(Signed by Nobuo Yaegashi)

Name of Person (print name) and/or Entity (print  
entity name and name of person signing )

N. Yaegashi

Signature (or signature of the person giving  
consent on behalf of the person)

Dec. 8. 2020

Date

Only complete this section if you are not the person. What is your relationship? (The person giving consent should be a substitute decision maker or legal guardian or should hold power of attorney for the person or entity.)

I am the dean of Tohoku University Graduate School of Medicine.

Why is the person not able to give consent? (e.g., is the person a minor, incapacitated, or deceased?)
