# Supplementary material for: Renal interstitial fibroblasts coproduce erythropoietin and renin under anaemic conditions
Source: PubMed Central journal article supplement — eBioMedicine. 2021 Jan 25;64:103209. doi: 10.1016/j.ebiom.2021.103209 (PMC7841315; doi:10.1016/j.ebiom.2021.103209), 2021-01-25
Supplement: mmc2.pdf [file mmc2.pdf]

**Renal interstitial fibroblasts coproduce erythropoietin and renin  
under anaemic conditions**

Kenichiro Miyauchi, Taku Nakai, Sakae Saito, Tae Yamamoto, Koji Sato, Taku Nakai, Koichiro  
Kato, Masahiro Nezu, Mariko Miyazaki, Sadayoshi Ito, Masayuki Yamamoto,  
Norio Suzuki

**This file includes 11 figures and 3 tables.**

Fig. S1: The full-scan image of Figure 2b.

Fig. S2: Anaemic hypotension of the ISAM mice is corrected after the ISAM mice recovered  
from anaemia.

Fig. S3: Detection of renin expression in the renal interstitial fibroblasts of ISAM mice.

Fig. S4: Renal interstitial renin is induced by acute haemolytic anaemia in mice and rats.

Fig. S5: Blood concentrations of aldosterone in the control and ISAM mice.

Fig. S6: Renal interstitial cells coexpressing renin and Epo.

Fig. S7: Hypoxia signalling is not involved in renin induction by renal interstitial cells.

Fig. S8: Expression levels of the RAS-related genes in mice administered antihypertensive  
agents.

Fig. S9: The *Ren1* expression profile in the kidney of mice with genetically induced pregnancy-  
associated hypertension.

Fig. S10: ISH of *Ren1* mRNA in injured kidneys from mice subjected to UUO for 0, 3, 14, or 21  
days.

Fig. S11: Renal interstitial renin expression is activated in spontaneously hypertensive rats.

Table S1: Primers and probes used in this study.

Table S2: Information on human kidney sections analysed in this study.

Table S3: *Ren1*<sup>+</sup> and *tdTomato*<sup>+</sup> cell counts in the renal interstitia of the ISAM-REC mice.

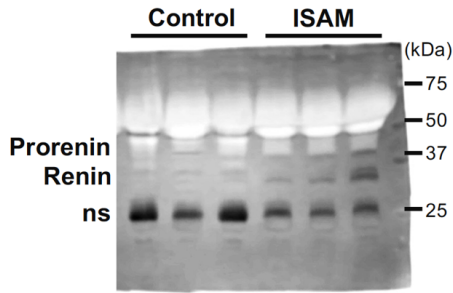

**Fig. S1.** Full-scan image of Figure 2b. Immunoblotting of control and ISAM plasma with an anti-renin antibody detected renin, its precursor (prorenin), and nonspecific bands (ns), which were probably immunoglobulin. Molecular size markers (kDa) are shown.

38

39

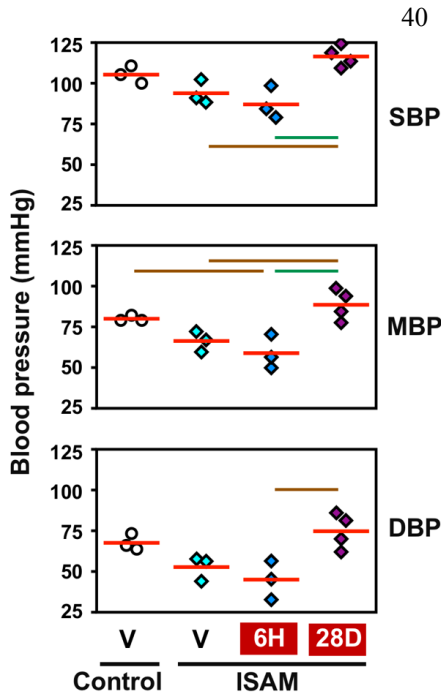

40

**Fig. S2.** Anaemic hypotension of ISAM mice is corrected after the mice recover from anaemia. SBP, MBP, and DBP were measured in ISAM mice administered C.E.R.A. for 4 weeks (28D). The littermate control mice treated with vehicle (V) were also tested at 11–14 weeks of age.  $n=3-4$  for each group. Solid bars indicate mean values. Green and brown lines indicate  $P<0.01$  and  $P<0.05$ , respectively. In the Tukey-Kramer HSD test

56

57

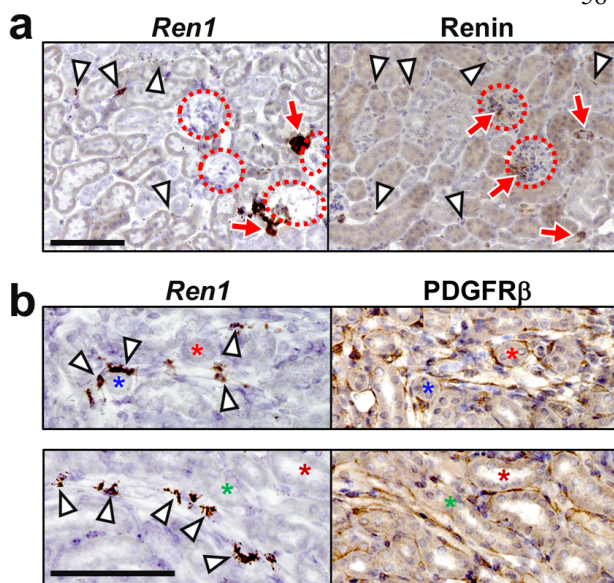

58

**Fig. S3.** Detection of renin expression in renal interstitial fibroblasts of ISAM mice. (a) Serial sections of ISAM kidney were stained with *Ren1* ISH (left) and renin IHC (right). (b) Serial sections of ISAM kidney were stained with *Ren1* ISH (left) and PDGFR $\beta$  IHC (right). The upper and lower panels are sections from different mice, and asterisks marked with the same colour indicate identical tubules in the left and right panels. The signals of each stain are brown (a and b). Dashed circles, arrows, and arrowheads indicate glomeruli, JG cells, and interstitial cells, respectively (a and b). Scale bars represent 100  $\mu\text{m}$ .

72

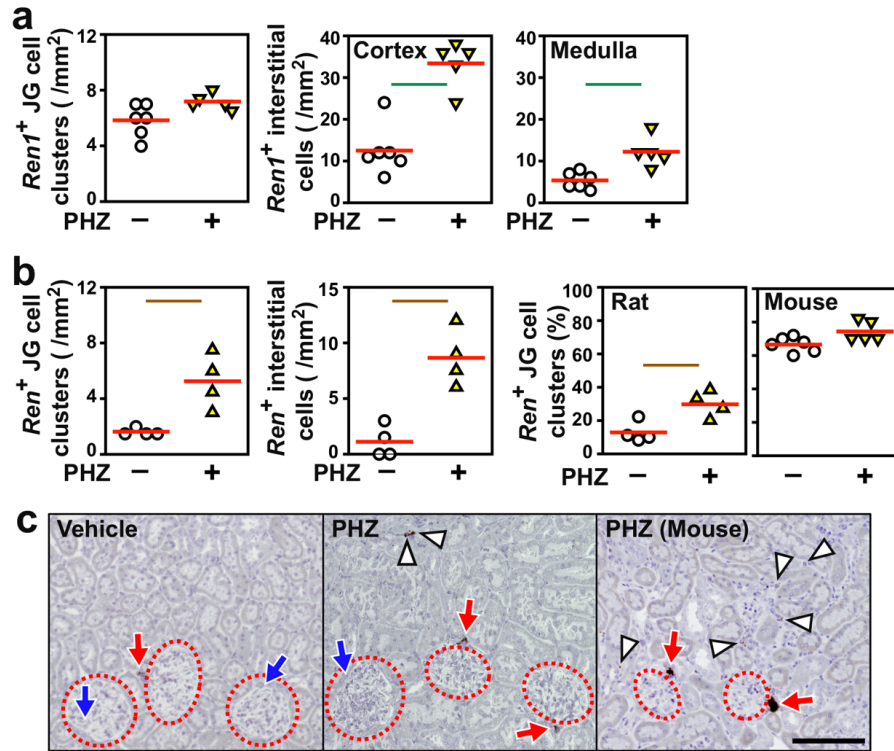

73  
74

75 **Fig. S4.** Renal interstitial renin is induced by acute haemolytic anaemia in mice and rats. (a)  
76 Quantification of *Ren1* ISH data (Fig. 5d) for kidney sections from mice injected with PHZ to induce  
77 haemolytic anaemia. (b) Quantification of *Ren* ISH data (Fig. 5f) for kidney sections from rats  
78 injected with PHZ to induce haemolytic anaemia. Red bars indicate mean values. Green and brown  
79 lines indicate  $P < 0.01$  and  $P < 0.05$ , respectively, in the Wilcoxon-Mann-Whitney tests.  $n = 4-6$  per  
80 group. (c) Representative images of *Ren* ISH in kidney sections of rats injected with vehicle or PHZ.  
81 An image of *Ren1* ISH from a PHZ-injected mouse kidney is also shown (right). Dotted circles and  
82 arrowheads are glomeruli and renin-expressing interstitial fibroblasts, respectively. Red and blue  
83 arrows indicate JG cells that are positive and negative for *Ren* (*Ren1* for the right panel) mRNA  
84 expression, respectively. The scale bar represents 100  $\mu\text{m}$ .

85  
86

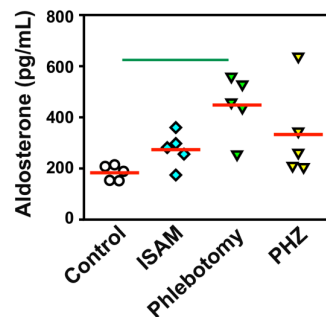

87

88 **Fig. S5.** Blood concentrations of aldosterone in control and ISAM mice. The data for mice subjected  
89 to phlebotomy and PHZ injection (Fig. 5a and c, respectively) are also shown. Red bars indicate mean  
90 values. The difference between the values of “Control” and “Phlebotomy” is statistically significant  
91 (green line,  $P < 0.01$  in the Tukey-Kramer HSD test), but the other differences are not.

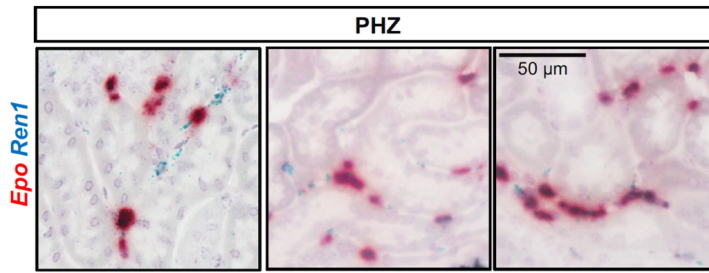

92 **Fig. S6.** Renal interstitial cells coexpressing renin and Epo. Representative images of ISH of *Epo*  
 93 (red) and *Ren1* (blue) mRNA in kidney sections from anaemic mice that were injected with PHZ.  
 94 The left panel is from Figure 5d.  
 95

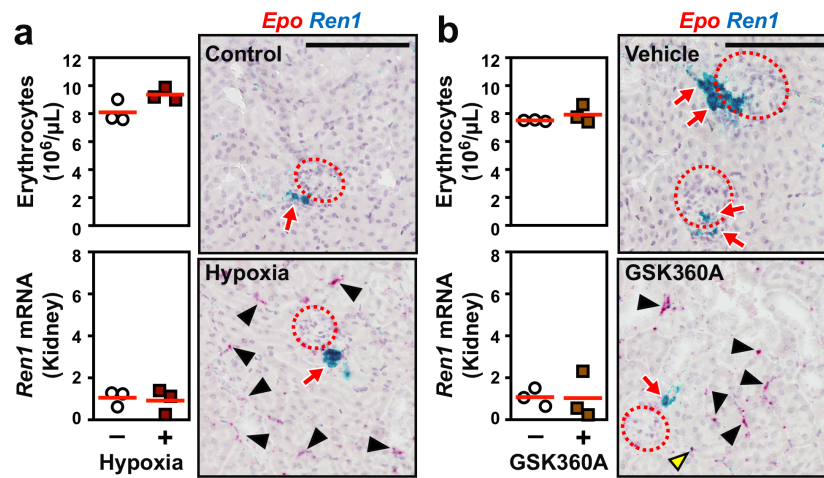

96 **Fig. S7.** Hypoxia signalling is not involved in renin induction by renal interstitial cells. (a and b)  
 97 Hypoxic exposure (6% oxygen for 48 hours, a) and PHDI administration (GSK360A, b) did not alter  
 98 the *Ren1* mRNA expression profiles in mouse kidneys, while *Epo* mRNA expression was activated  
 99 in renal interstitial cells. Erythrocyte counts, *Ren1* mRNA levels, and representative images of ISH  
 100 of *Epo* (red) and *Ren1* (blue) mRNA in kidney sections are shown. The average expression levels  
 101 (red bars) in control mice were set as 1 for each gene expression analysis. n=3 for each group. Dashed  
 102 circles, arrows, and arrowheads indicate glomeruli, JG cells positive for *Ren1* expression, and  
 103 interstitial cells positive for *Epo* expression, respectively. Scale bars represent 100 µm.  
 104  
 105

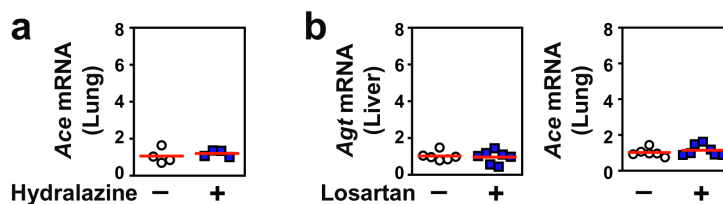

106 **Fig. S8.** Expression levels of RAS-related genes in mice administered antihypertensive agents. (a)  
 107 *Ace* mRNA expression was not affected by hydralazine administration in the lungs of wild-type  
 108 C57BL/6 mice. The experimental scheme is shown in Figure 6a. (b) Relative mRNA expression  
 109 levels of the *Agt* gene in liver and the *Ace* gene in lung were not affected by losartan injection in wild-  
 110 type DBA/2 mice. The experimental scheme is shown in Figure 6c. The average expression levels  
 111 (red bars) in control mice were set as 1 for each gene expression analysis. n=4–7 per group.

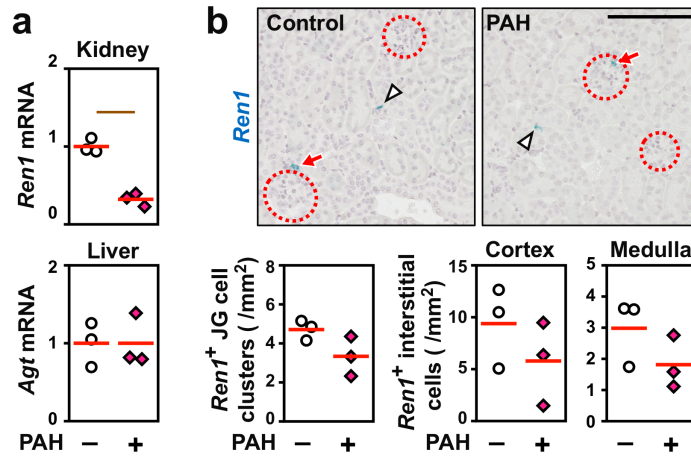

112

113 **Fig. S9.** The *Ren1* expression profile in the kidney of mice with genetically induced pregnancy-  
 114 associated hypertension (PAH). (a) *Ren1* mRNA levels in the kidney and *Agt* mRNA levels in the  
 115 liver of PAH mice at E16.5. (b) Representative images and quantification of ISH of *Ren1* (blue).  
 116 Dotted circles, red arrows, and arrowheads indicate glomeruli, JG cells, and interstitial fibroblasts  
 117 positive for *Ren1*, respectively. The scale bar is 100  $\mu\text{m}$ .  $n=3$  per group. The difference in *Ren1*  
 118 mRNA levels (a) is statistically significant (brown line,  $P<0.05$ ), while the other differences are not,  
 119 using the Wilcoxon-Mann-Whitney test.

120

121

122

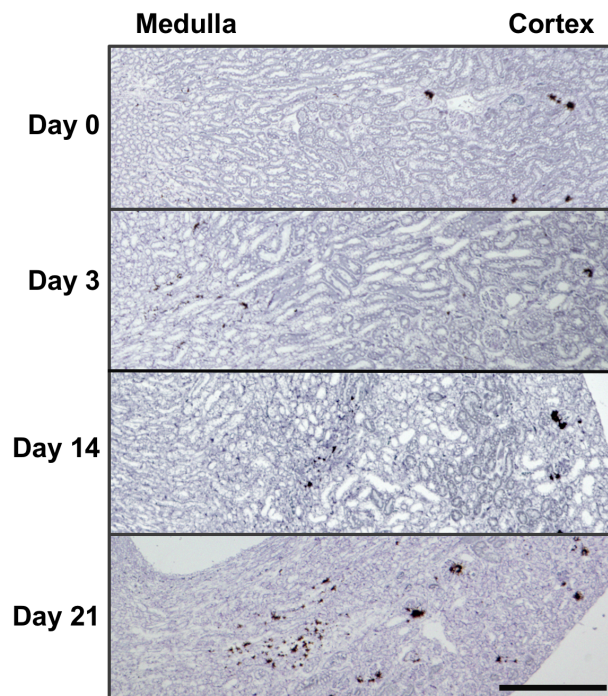

123

124 **Fig. S10.** ISH of *Ren1* mRNA (brown) in injured kidneys from mice subjected to UUO for 0, 3, 14,  
 125 or 21 days. The scale bar is 500  $\mu\text{m}$ .

126

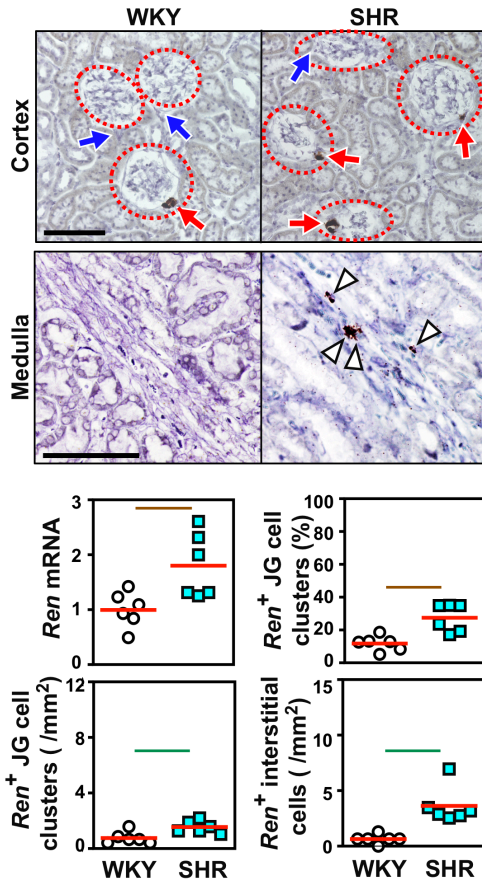

127

128 **Fig. S11.** Renal interstitial renin expression is activated in spontaneously hypertensive rats (SHR).  
 129 Representative images and quantification of ISH of *Ren* mRNA in kidney sections of SHR and their  
 130 normal control rats (WKY). Arrowheads and dotted circles are interstitial fibroblasts that are positive  
 131 for *Ren* mRNA expression and glomeruli, respectively. Red and blue arrows indicate JG cells that are  
 132 positive and negative for *Ren* mRNA expression, respectively. Scale bars represent 100  $\mu$ m. The  
 133 average expression level (red bar) in WKY were set as 1 for renal *Ren* mRNA expression analysis.  
 134 Green and brown lines indicate  $P < 0.01$  and  $P < 0.05$ , respectively, in the Wilcoxon-Mann-Whitney  
 135 test. n=6 per group.

136 **Table S1.** Primers and probes used in this study.

| Primers and probes for quantitative PCR |                                        |
|-----------------------------------------|----------------------------------------|
| Target                                  | Sequence (5' – 3')                     |
| <i>Ren1</i>                             | CCCGACATTTCCTTTGACC                    |
|                                         | TGTGCACAGCTTGTCTCTCC                   |
| <i>Agt</i>                              | GGCAAATCTGAACAACATTGG                  |
|                                         | TTCTCCTCTCCTGCTTTGA                    |
| <i>Ace</i>                              | AAAGAAGCTTCAGAACCCTGGAC                |
|                                         | GTCTAGCAGGATCTGGTTGTACTCT              |
| <i>Hprt</i>                             | CCGGCTCCGTTATGGC                       |
|                                         | GGTCATAACCTGGTTCATCATCA                |
|                                         | (Probe) CGCAGCCCTGGCGTCGTGATTA         |
| <i>Epo</i>                              | GAGGCAGAAAATGTCACGATG                  |
|                                         | CTTCCACCTCCATTCTTTTCC                  |
| <i>EpoGFP</i>                           | GAAGACTTGCAGCGTGGAC                    |
|                                         | GGTGGATCCTAAAGCAGCAG                   |
| <i>Ren2</i>                             | GCCTCAGCAAGACTGATTCC                   |
|                                         | ATATTCATGTAGTCTCTTCTCC                 |
| Probes for ISH                          |                                        |
| Target                                  | Serial No. (Advanced Cell Diagnostics) |
| Mouse <i>Epo</i>                        | Mm-Epo                                 |
| Mouse <i>Epo</i>                        | Mm-Epo-C2 (for double staining)        |
| Mouse <i>Ren1</i>                       | Mm-Ren1                                |
| Rat <i>Ren1</i>                         | Rn-Ren                                 |
| Human <i>REN</i>                        | Hs-REN                                 |
| <i>tdTomato</i>                         | Tomato-C2 (for double staining)        |

137

138

139 **Table S2.** Information on the human kidney sections analysed in this study.

|                                        | Patient 1                    | Patient 2                            |
|----------------------------------------|------------------------------|--------------------------------------|
| Catalogue number                       | CS700464                     | CS705284                             |
| Sample ID                              | PA00001471                   | PA00005604                           |
| Case ID                                | CI0000000192                 | CI0000007856                         |
| Gender                                 | Male                         | Female                               |
| Age                                    | 66                           | 43                                   |
| Race                                   | Not Reported                 | White or Caucasian                   |
| Case diagnosis<br>(Reason for Surgery) | Hydronephrosis               | Chronic tubulointerstitial nephritis |
| Sample diagnosis                       | Tubulointerstitial nephritis | Tubulointerstitial nephritis         |
| Lesional area                          | 100% in a section            | 100% in a section                    |

140 Provided by OriGene (<https://www.origene.com/products/tissues/tissue-search>).

141

142

143

144 **Table S3.** *Ren1*<sup>+</sup> and *tdTomato*<sup>+</sup> cell counts in the renal interstitia of ISAM-REC mice.

|                                                                           | Cortex       | Medulla     |
|---------------------------------------------------------------------------|--------------|-------------|
| <i>Ren1</i> <sup>+</sup> (/mm <sup>2</sup> )                              | 117.3 ± 25.7 | 39.5 ± 13.9 |
| <i>tdTomato</i> <sup>+</sup> (/mm <sup>2</sup> )                          | 345.7 ± 35.7 | 18.4 ± 5.5  |
| <i>Ren1</i> <sup>+</sup> <i>tdTomato</i> <sup>+</sup> (/mm <sup>2</sup> ) | 102.0 ± 20.6 | 7.0 ± 1.3   |
| Double <sup>+</sup> / <i>Ren1</i> <sup>+</sup>                            | 0.87         | 0.18        |
| Double <sup>+</sup> / <i>tdTomato</i> <sup>+</sup>                        | 0.29         | 0.38        |

145 Cells were counted in kidney sections from 3 independent mice that underwent ISH of *Ren1* and146 *tdTomato* mRNAs (Figure 4c). The data show the mean ± standard deviation.

147
